# Supplementary material for: FORCCHN V2.0: an individual-based model for predicting multiscale forest carbon dynamics
Source: Copernicus journal article supplement (doi:10.5194/gmd-15-6863-2022), 2022-09-09
Supplement: Supplementary file 1 [file gmd-15-6863-2022-supplement.pdf]

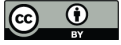

*Supplement of*

## **FORCCHN V2.0: an individual-based model for predicting multiscale forest carbon dynamics**

**Jing Fang et al.**

*Correspondence to:* Xiaodong Yan (yxd@bnu.edu.cn)

The copyright of individual parts of the supplement might differ from the article licence.

1 **Methods S1. Daily processes of FORCCHN2**

2 **Photosynthesis** Gross primary productivity of an individual tree is given by:

$$GPP_i = \min(f_c \cdot f_{dry} \cdot f_T \cdot GPPM_i, an \cdot aNS) \quad (S1)$$

3 where  $GPP_i$  is the daily gross primary productivity of the  $i$ th individual tree (kgC/d),  
 4  $GPPM_i$  is the maximal daily gross primary productivity of the  $i$ th tree (kgC/d) (Oikawa  
 5 1985);  $f_c$ ,  $f_{dry}$ ,  $f_T$  and  $an \times aNS$  represent the effects of carbon dioxide (Kaduk and  
 6 Heimann 1996), water, temperature and soil available nitrogen on GPP, respectively.  
 7  $aNS$  is the soil available nitrogen (kgN/m<sup>2</sup>); and  $an$  is the C/N ratio parameter of the  
 8 assimilation with  $an=150$ ;

$$GPPM_i = \frac{2 \cdot Am_j \cdot DL}{Kl_j} \ln \frac{1 + \sqrt{1 + Kl_j \cdot Sl_j \cdot \frac{PAR_i}{Am_j}}}{1 + \sqrt{Kl_j \cdot Sl_j \cdot PAR_i \cdot \frac{\exp(-Kl_j \cdot LAI_i)}{Am_j}}} \quad (S2)$$

9 where  $DL$  (daylength) is the possible sunshine duration (h);  $PAR_i$  is the amount of  
 10 photosynthetic active radiation at the top of the canopy at noon (W/m<sup>2</sup>); and  $LAI_i$  is the  
 11 leaf area index of the  $i$ th tree. For the  $i$ th individual in the  $j$ th plant functional type:  $Am_j$ ,  
 12  $Kl_j$  and  $Sl_j$  represent the maximal photosynthesis [kgC/(m<sup>2</sup>·h)], the extinction  
 13 coefficient and the initial slope of light intension and photosynthesis  
 14 [(kgC/(m<sup>2</sup>·h))/(W/m<sup>2</sup>)], respectively.

$$f_c(C_s) = 1 + \frac{C_s - C_0}{C_s + 2C_0} \quad (S3)$$

15 where  $C_s$  is the CO<sub>2</sub> concentration of the simulation year;  $C_0$  is CO<sub>2</sub> reference  
 16 concentration, and  $C_0=340$  ppm.



$$f_{dry}(sw, rh) = \left\{ \frac{\min \left[ 1, \frac{sw}{FC} + \max(rh - 0.5, 0.1) \right]}{dry} \right\}^{0.5} \quad (S4)$$

17 where  $sw$  is soil water content (cm);  $FC$  is field capacity (cm);  $rh$  is air relative humidity;  
 18 and  $dry$  is the individual's capability of enduring drought that ranges from 0 to 1.

$$f_T(T) = \left( \frac{T_{max} - T}{T_{max} - T_{opt}} \right)^{\frac{T_{max} - T_{opt}}{T_{max} - T_{min}}} \cdot \left( \frac{T - T_{min}}{T_{opt} - T_{min}} \right)^{\frac{T - T_{min}}{T_{opt} - T_{min}}} \quad (S5)$$

19 where  $T_{min}$ ,  $T_{opt}$  and  $T_{max}$  denote the lowest, the optimum and the highest temperature  
 20 of photosynthesis ( $^{\circ}C$ ), respectively;  $T$  is daily mean temperature ( $^{\circ}C$ ).

21

22 **Autotrophic respiration** The autotrophic respiration of each plant includes  
 23 maintenance respiration and growth respiration. The formula for maintenance  
 24 respiration is expressed as:

$$RM_{ik} = t_{resp} \times r_k C_{ik} \quad (S6)$$

25 where  $RM_{ik}$  is daily maintenance respiration of  $i$ th individual tree (kgC/d);  $k$  represents  
 26 tree organ, including leaves, branches, stems, main roots, and fine roots;  $r_k$  is the relative  
 27 respiration rate of tree organ at  $15^{\circ}C$  (1/d);  $C_{ik}$  is the carbon amount (kgC), and when  $k$   
 28 denotes leaves or fine root,  $C_i$  is leaf content or fine root content; When  $k$  denotes stem  
 29 or main root,  $C_{ik}$  is sapwood content (kgC);

$$RG_i = t_{resp} \times r_g \times (GPP_i - RM_i) \quad (S7)$$

30 where  $RG_i$  the daily growth respiration of  $i$ th individual tree (kgC/d) (Ruimy et al.,  
 31 1996);  $r_g$  the growth respiration coefficient, and  $r_g=0.25$ .

32 In Equation S6 and S7,  $t_{resp}$  represents the effect of air temperature on plant  
 33 respiration, this value is computed as:

$$t_{resp} = t_{resp1} + t_{resp2} \quad (S8)$$

$$t_{resp1} = \frac{DL}{24} \times e^{\frac{\ln(tg_1)}{10 \times (T_d - 15)}} \quad (S9)$$

$$tg_1 = 2 \times e^{-0.009 \times (T_d - 15)} \quad (S10)$$

$$t_{resp2} = \frac{24 - DL}{24} \times e^{\frac{\ln(tg_2)}{10 \times (T_n - 15)}} \quad (S11)$$

$$tg_2 = 2.2 \times e^{-0.009 \times (T_n - 15)} \quad (S12)$$

34 where  $t_{resp1}$  and  $t_{resp2}$  represent the effect of daytime air temperature and nighttime air  
 35 temperature on plant respiration, respectively;  $T_d$  is daytime air temperature (°C);  $T_n$  is  
 36 nighttime air temperature (°C);  $DL$  is the possible sunshine duration for each day (h).

37

38 **Litter production** The litter fluxes of leaves and fine roots are computed as follows:

$$L_{ik} = l_k \times C_{ik} \quad (S13)$$

39 where  $k$  is leaf or fine roots;  $L_{ik}$  is the flux of leaf litter or fine roots of the  $i$ th individual  
 40 tree (kgC/d);  $C_{ik}$  the corresponding carbon amount (kgC/d);  $l_k$  the relative litter fall rate  
 41 (1/d).

42

43 **Soil organic matter respiration and transfer progress:** the model runs on a daily  
 44 timescale for soil processes, and therefore adopts a modified soil carbon budget model  
 45 based on CENTURY to characterize forest soils. The CENTURY model was originally  
 46 developed for simulating and forecasting carbon cycle and productivity of grasslands,  
 47 but now it is widely used for forest ecosystems.

48 Leaf litter and fine root litter can simultaneously fall into the soil structural litter pool  
 49 and the soil metabolic litter pool, and the proportions are calculated by:

$$f_m = 0.85 - 0.018 \times \frac{N_r}{L_r} \quad (\text{S14})$$

$$f_s = 1 - f_m \quad (\text{S15})$$

50 where  $f_m$  is the proportion into metabolic pool;  $f_s$  is the proportion into structural pool;  
 51  $N_r$  and  $L_r$  are the respective nitrogen and lignin content in fresh litter.

52 There are ten soil carbon pools in FORCCHN, the decomposition rate and respiration  
 53 release in each carbon pool are calculated as:

$$D_u = s_u \times g_T \times g_W \times e^{-b \times L_s} \times C_u \quad (\text{S16})$$

$$R_u = p_u \times D_u \quad (\text{S17})$$

$$SD_{uv} = p_v \times (D_u - R_u) \quad (\text{S18})$$

$$\sum p_v = 1 \quad (\text{S19})$$

$$g_T = e^{\frac{3.36 \times (T_s - 40)}{T_s + 31.79}} \quad (\text{S20})$$

$$g_W = 1 - \left( \frac{sw}{ff \times FC} - 1 \right)^2 \quad (\text{S21})$$

54 where  $D_u$  is daily carbon decomposition of the  $u$ th soil carbon pool [ $\text{kgC}/(\text{m}^2 \cdot \text{d})$ ];  $s_u$  the  
 55 relative decomposition rate of the  $u$ th pool (1/d);  $g_t$  and  $g_w$  represent the effect of  
 56 temperature and water on the decomposition rate, respectively;  $b$  is an exponential term  
 57 that describes the extent to which decomposition is reduced by lignin with  $b=5.0$ .  $L_s$  is  
 58 the lignin content in the soil structural litter pool;  $C_u$  is the difference between carbon  
 59 content and lignin content of the  $u$ th pool ( $\text{kgC}/\text{m}^2$ );  $R_u$  is daily carbon respiration  
 60 release of the  $u$ th pool [ $\text{kgC}/(\text{m}^2 \cdot \text{d})$ ];  $p_u$  is the respiration proportion of the  $u$ th pool;  
 61  $SD_{uv}$  is daily carbon content transported from  $u$ th pool to  $v$ th pool [ $\text{kgC}/(\text{m}^2 \cdot \text{d})$ ];  $p_v$  is  
 62 the proportion transported to the  $v$ th pool;  $sw$  is the soil water content (cm);  $ff$  is a  
 63 constant with  $ff=0.6$ ;  $FC$  is the field capacity (cm);  $T_s$  is the soil temperature ( $^{\circ}\text{C}$ ).

64

65 **Soil water dynamics** For the dynamics of soil water content, we refer to the calculation  
 66 method of the Bridging Event and Continuous Hydrological (BEACH) model (Sheikh  
 67 et al., 2009). The soil water ( $W_s$ ) at the daily step is determined by the total precipitation  
 68 ( $Pre$ ), interception ( $Incep$ ), infiltration ( $Inf$ ), and actual transpiration ( $E_a$ ):

$$\frac{dW_s}{dt} = Pre(t) - Incep(t) - Inf(t) - E_a(t) \quad (S22)$$

69 The interception by vegetations is estimated by:

$$Incep = 0.25 \times LAI \times \left(1 - \frac{1}{1 + \frac{f \times Pre}{0.25 \times LAI}}\right) \quad (S23)$$

$$f = 1 - e^{-\mu \times LAI} \quad (S24)$$

70 where  $LAI$  is the leaf area index;  $f$  is the proportion of soil covered by vegetation;  $\mu$  is  
 71 the light use efficiency parameter (i.e. set as 0.6 for trees).

72 The model assumes that infiltration proceeds until the uptake capacity of the surface  
 73 layer (0–0.20 m) has been reached as a result of precipitation.

$$Inf = \min[Pre - Incep, (W_F - W_s) \times depth_1] \quad (S25)$$

74 where  $W_F$  is the saturated soil moisture content ( $m^3 m^{-3}$ );  $depth_1$  is the surface layer  
 75 thickness (m).

76 The actual transpiration ( $E_a$ ) is determined by potential evapotranspiration ( $E_0$ ):

$$E_a = K_r \times K_e \times E_0 \quad (S26)$$

$$K_r = \frac{W_s - \frac{1}{3} \times W_p}{25 - \frac{1}{3} \times W_p} \quad (S27)$$

$$K_e = -0.5 + \max\{0.55, 1.2 + [0.04 \times (u_2 - 2) - 0.004 \times (RH_{min} - 45)] \times \left(\frac{h}{3}\right)^{0.3}\} \quad (S28)$$

77 where  $K_r$  is a dimensionless evaporation reduction coefficient dependent on the soil

78 water content;  $W_p$  is the wilting point;  $K_e$  is the soil evaporation coefficient;  $u_2$  is the  
 79 wind speed;  $RH_{min}$  is the air relative humidity;  $h$  is the tree height.

80

81 **Light distribution** For the light competition of different trees, we used a standard gap-  
 82 model formulation to describe the vertical radiation environment. The gap model's light  
 83 distribution process was described by Xiaodong & Shugart (2005):

$$AL_m = AL_{top} \times e^{(-l_{nee} \cdot LAI_{nee} - l_{bro} \cdot LAI_{bro})} \quad (S29)$$

84 where  $AL$  was the available light;  $m$  was the  $m$ th height (unit: m);  $top$  was the top height  
 85 of the forest canopy;  $l_{nee}$  and  $l_{bro}$  were the coniferous and broadleaf extinction coefficient;  
 86  $LAI_{nee}$  and  $LAI_{bro}$  were the sums of the leaf areas in the plot of all higher broadleaf trees  
 87 and needle trees.

88

89 **Leaf and fine roots growth** We adopted a method based on thermal time to simulate  
 90 the growth of leaf biomass ( $G_P$ ) and fine roots biomass ( $G_F$ ) (Schiestl-Aalto *et al.*, 2015).  
 91 We assumed that leaf biomass increment is related to the maximum daily growth rate  
 92 and the NSC storage pool:

$$\frac{dG_P}{dt} = k_N(t) \times g(t) \times f(s(t)) \times MG \quad (S30)$$

$$\frac{dG_F(t)}{dt} = \frac{1}{2} \times k_N(t) \times \frac{dG_P}{dt} \quad (S31)$$

93 where  $k_N$  is the impact of NSC storage pool on growth;  $g$  is the response of growth to  
 94 environmental factors;  $f$  is the response of growth to the leaf development stage  $s$ ;  $MG$   
 95 is the maximum daily growth rate. The  $k$  is a limiting factor for growth if the NSC  
 96 storage below a critical level:

$$k_N(t) = \min\left\{1, \frac{1 - e^{\delta \times NP(t)}}{1 - e^{\delta \times NP_0}}\right\} \quad (\text{S32})$$

97 where  $\delta$  is a parameter;  $NP$  is the NSC storage;  $NP_0$  is the critical level, which is set as  
 98 the initial storage size in the corresponding year. Note that the  $NP_0$  is assumed to be 3%  
 99 of the aboveground wood biomass in the first year (Fang *et al.*, 2020).

100 The parameters  $g$  and  $f$  describe phenology variations. The short-term growth response

101 ( $g$ ) is:

$$g(t) = \begin{cases} 0 & , \quad T(t) < 0 \\ (1 + e^{-\alpha \times (T(t) - \beta)})^{-1} & , \quad T(t) \geq 0 \end{cases} \quad (\text{S33})$$

102 where  $\alpha$  and  $\beta$  are parameters, and  $T(t)$  is the daily average temperature ( $^{\circ}\text{C}$ ). For  
 103 temperate trees, the leaves have vital activities above  $0^{\circ}\text{C}$ . The leaves of tropical trees  
 104 can keep active growth throughout the whole year.

105 The development stage function ( $f(s(t))$ ) of leaf growth is based on the assumption that  
 106 the leaf development is the highest in the middle of growing period and equally low in  
 107 the early and late season. And the process is written as:

$$f(t) = \begin{cases} 0 & , \quad s(t) < 0 \text{ or } s(t) > s^c \\ \frac{1}{2} \left( \sin\left(\frac{2\pi}{s^c} \times \left(s(t) - \frac{s^c}{4}\right)\right) + 1 \right) & , \quad 0 \leq s(t) \leq s^c \end{cases} \quad (\text{S34})$$

108 where  $s$  is the development stage of the leaf,  $s_c$  is the threshold for cessation of growth.

109 Growth begins at  $t_b$  time when the thermal time requirement for growth onset, ( $s(t_b) > 0$ ),

110 is exceeded; and the growth ceases at  $t_c$  time when the requirement for growth cessation,

111 ( $s(t_c) > s_c$ ), is exceeded. The development stage ( $s$ ) is calculated by:

$$\frac{ds(t)}{dt} = g(t), t_0 < t \quad (\text{S35})$$

$$s(t_0) = s^0 \quad (\text{S36})$$

$$s(t_c) = s^c \quad (\text{S37})$$

112 where  $s^0$  is the initialized value of  $s$ ;  $t_0$  is the tree dormant time, the beginning on the  
 113 first day of the year. We estimated  $s^0$  and  $s^c$  fell in a reasonable range taken from Fang  
 114 *et al.* (2020) and Schiestl-Aalto *et al.* (2015).

115 The maximum daily growth rate of leaves ( $MG$ ) has been shown to relate to the  
 116 maximum leaf biomass ( $B_{max}$ ) in previous years (Schiestl-Aalto *et al.*, 2013).

$$MG_i = B_{max,i-1} \times R_p \quad (S38)$$

117 where  $i$  is the  $i$ th year;  $R_p$  is the growth coefficient.

118

119 **Spring phenology** The spring phenology sub-model was based on the effective  
 120 temperature and thermal time. Following this approach, the daily temperature response  
 121 was simulated by using a sigmoid function of the average temperature (Cannell & Smith  
 122 1983; Schiestl-Aalto *et al.* 2015). Leaf growth began at the time ( $Y_{SOS}$ ) when heat  
 123 requirement exceeded the threshold ( $S_A$ ):

$$Y_{SOS} = t, \text{ if } s_{heat}(t) \geq S_A \quad (S39)$$

$$s_{heat}(t) = \sum_{j=1}^t \frac{1}{1 + e^{-0.185(T(j)-18.4)}}, \text{ if } T(j) > T_A \quad (S40)$$

124 where  $s_{heat}$  was the daily sum of heat rates;  $T_A$  was the threshold parameter to determine  
 125 the effective high temperature;  $T$  was the air average temperature;  $t$  was the time to  
 126 begin growth;  $j$  was the day of the year.

127

128 **Autumn phenology** Compared to the modeling of spring phenology, modeling of  
 129 autumn phenology was more challenging (Piao *et al.* 2019). Here, we used the  
 130 accumulated cold degree-days and considered the effects by photoperiod (Delpierre *et*

131 *al.* 2009). Similar to the spring phenology, leaves began to color at the time ( $Y_{EOS}$ ) when  
 132 the chilling accumulation exceeded the threshold ( $S_B$ ):

$$Y_{EOS} = t, \text{ if } s_{cold}(t) \geq S_B \quad (S41)$$

$$s_{cold}(t) = \sum_{j=1}^t (T_B - T(j)) \frac{P(j)}{P_{start}}, \text{ if } P(j) < P_{start} \text{ and } T(j) < T_B \quad (S42)$$

133 where  $s_{cold}$  was the daily sum of chilling rates;  $T_B$  was the threshold to determine the  
 134 effective low temperature;  $P_{start}$  was the threshold to determine the effective  
 135 photoperiod.

136

137 **Phenology parameterization** Using the LAI data of the first observed year, parameters  
 138  $S_{A0}$  indicating the initial heat parameter that estimated by the spring phenological dates:

$$S_{A0} = - \sum_{t=1}^{t_{y_0, onset}} g_{heat}(t) \quad (S43)$$

139 where  $y_{0, onset}$  is the spring phenological dates in the first year.

140 We only estimated the  $T_B$  in one site ( $T_{B,1}$ , which was set to 30.0 °C at the Acadia  
 141 National Park site), other sites were estimated by the average temperature between the  
 142 first day and the observed dates of autumn phenology in one year ( $T_{cease}$ ) (Acadia  
 143 National Park site had the  $T_{cease}$  of 8.6 °C)

$$T_{B,i} = \frac{T_{B,1}}{T_{cease,1}} \times T_{cease,i} \quad (S44)$$

144 where  $i$  represents the  $i$ th site (i.e.  $i$ th cell of 0.5 degree in this study).

145  $S_B$  was the chilling threshold of leaf cessation that estimated by the autumn phenological  
 146 dates:



$$S_B = \sum_{t=1}^{t_{y0,cease}} g_{cold}(t) \quad (S45)$$

147 where  $t_{y0,cease}$  is the autumn phenological dates in the first year.

148

149 **Light competition** For the light competition of different tree, we used a standard gap-  
 150 model formulation to describe the vertical radiation environment. The gap model's light  
 151 distribution process was described by Xiaodong & Shugart (2005):

$$AL_m = AL_{top} \times e^{(-l_{nee} \cdot LAI_{nee} - l_{bro} \cdot LAI_{bro})} \quad (S46)$$

152 where  $AL$  was the available light;  $m$  was the  $m$ th height (unit: m);  $top$  was the top height  
 153 of the forest canopy;  $k_{nee}$  and  $k_{bro}$  were the coniferous and broadleaf extinction  
 154 coefficient;  $LAI_{nee}$  and  $LAI_{bro}$  were the sum of the leaf areas in the plot of all higher  
 155 broadleaf trees and needle trees.

156

157

## 158 ***Methods S2. Annual processes of FORCCHN2***

159 The primary annual processes consist of increments of tree height, basal diameter, and  
 160 production of CWD (coarse wood debris). The model assumes that annual litter  
 161 production falls into one of two cases based on two assumed thresholds. On one hand,  
 162 if the year-end NSC slow pool is greater than the first threshold, only the flower litter  
 163 production reaches the maximum possible amount. On the other hand, if the year-end  
 164 NSC slow pool is greater than the second threshold, both flower and fruit litter  
 165 production are maximal. The formulas are given as:

$$L_{i,year} \begin{cases} BF_{i,year} & BF_{i,year} \leq lm_1 \\ lm_1 + (BF_{i,year} - lm_1) \times 0.3 & lm_1 < BF_{i,year} \leq lm_2 \\ lm_2 & BF_{i,year} > lm_2 \end{cases} \quad (S47)$$

$$DC_i = BF_{i,year} - L_{i,year} \quad (S48)$$

166 where  $L_{i,year}$  is annual litter production of the  $i$ th individual tree (kgC);  $BF_{i,year}$  is the  
 167 annual NSC slow pool (kgC);  $lm_1$  and  $lm_2$  are the first and the second thresholds of litter  
 168 production, respectively (kgC), and  $lm_1=0.0001$ ;  $DC_i$  is NSC storage (kgC), and 95%  
 169  $DC_i$  is transferred to support the growth of organs:

$$DC_i = \frac{[f_{wood}(d + \Delta d, h + \Delta h, b, hr, astem) - f'_{wood}(d, h, b, hr, astem)]}{0.95} \quad (S49)$$

$$\Delta h = cp \times \Delta d \quad (S50)$$

170 where  $f_{wood}$  is the wood biomass added in the current year (kgC);  $f'_{wood}$  is the wood  
 171 biomass added in the previous year (kgC);  $d$  is the basal diameter (m);  $\Delta d$  the  
 172 increment of basal diameter (m);  $h$  is the tree height (m);  $\Delta h$  is the increment of tree  
 173 height (m);  $b$  is the twig height (m);  $hr$  is the root depth (m);  $astem$  is the bulk density  
 174 of wood (kgC/m<sup>3</sup>);  $cp$  is a constant decided by illumination gradients of tree canopy.

175

176 **Tree death** Individual trees are assumed to die when daily net photosynthate and NSC  
 177 pools are not enough to support the growth of leaves (in some cases where previous  
 178 years photosynthate has been allocated to the growth of canopy height and basal  
 179 diameter (**Eqn S50**), the plant autotrophic respiration might be greater than the  
 180 photosynthesis in some abnormal weather conditions). When tree death occurs in a  
 181 given year, the C, N from dead trees is assumed to completely transfer to the soil pools  
 182 at the end of the year (on the 31st December), and continue to participate in new C, N

183 cycle in the coming year. In the current study, since the simulated time period is less  
184 than 50 years, we assume the new individual trees do not contribute materially to forest  
185 processes.

186

187

### 188 ***Methods S3. Model initialization processes***

189 **DBH estimation** Although different tree species and individual trees have variable  
190 growth rates, the model uses a uniform method to express the initial vegetation  
191 conditions. Previous studies showed a linear relationship between the individual tree  
192 DBH and leaf area index (Petersen et al. 2007), the model LAI is calculated as follows:

$$DBH = \frac{LAI}{45} + 0.02 \quad (S51)$$

193 where  $DBH$  (m) is the diameter at breast height,  $LAI$  is the leaf area index.

194

195 **Tree height estimation** The model uses tree diameter-height curves (Ogawa 1969) to  
196 simulate each tree's height:

$$\frac{1}{TH} = \frac{1}{a \times DBH^b} + \frac{1}{H^*} \quad (S52)$$

197 where  $TH$  (m) is the tree height;  $a$ ,  $b$ , and  $H^*$  are the regression coefficients,  $a=0.82$ ,  
198  $b=1.25$ ,  $H^*=37.26$  (Wang et al. 2006).

199 The height of lowest living branch ( $BH$ ) is calculated by:

$$BH = \frac{1}{3}TH \quad (S53)$$

200 **Initialized Biomass estimation** The initialized leaf biomass ( $G_{L0}$ ) is calculated by tree  
201 species:

$$G_{L0}(i) = \begin{cases} 0, & i = \text{deciduous tree} \\ 1.99DBH^{2.13}BH^{-0.39}, & i = \text{evergreen tree} \end{cases}, \quad (S54)$$

202 The initialized fine root biomass ( $G_{F0}$ ) is proportional to leaf biomass:

$$G_{F0} = \frac{1}{2}G_{L0} \quad (S55)$$

203 The initialized wood biomass comprises stem biomass ( $G_{AS0}$ ), twig biomass ( $G_{AT0}$ ), and  
204 root biomass ( $G_{B0}$ ):

$$G_{W0} = G_{AS0} + G_{AT0} + G_{B0} \quad (S56)$$

$$G_{AS0} = 2.02 \times Astem \times DBH^2 \times TH \quad (S57)$$

$$G_{AT0} = 1.12 \times Astem \times DBH^2 \times TH \times \left(1 + \frac{2}{TH}\right)^2 \times \left(1 - \frac{2}{TH}\right) \quad (S58)$$

$$G_{B0} = 2.02 \times Astem \times DBH^2 \times TH \times \left[\left(1 + \frac{2}{TH}\right)^2 \times \left(1 + \frac{2}{TH}\right) - 1\right] \quad (S59)$$

205 where  $Astem$  is a parameter taken from Table S1.

206

207

#### 208 **Methods S4. Statistical analyses**

209 We used Pearson correlation coefficient ( $r$ ), model efficiency ( $E$ ), root mean square  
210 error ( $RMSE$ ), mean absolute error ( $MAE$ ), and bias ( $bias$ ):

$$E = 1 - \frac{\sum_{i=1}^n (X_i - Y_i)^2}{\sum_{i=1}^n (Y_i - \bar{Y})^2} \quad (S60)$$

$$bias = \frac{1}{n} \sum_{i=1}^n (X_i - Y_i) \quad (S61)$$

211 where the  $X_i$  and  $Y_i$  are the predicted and measured data, respectively;  $\bar{X}$  and  $\bar{Y}$

212 represent their mean values. The range of  $E$  was  $-\infty$  to 1, and  $E$  close to 1 means a

213 perfect match between the predictions and measurement.

214

### Forest types and flux tower distribution

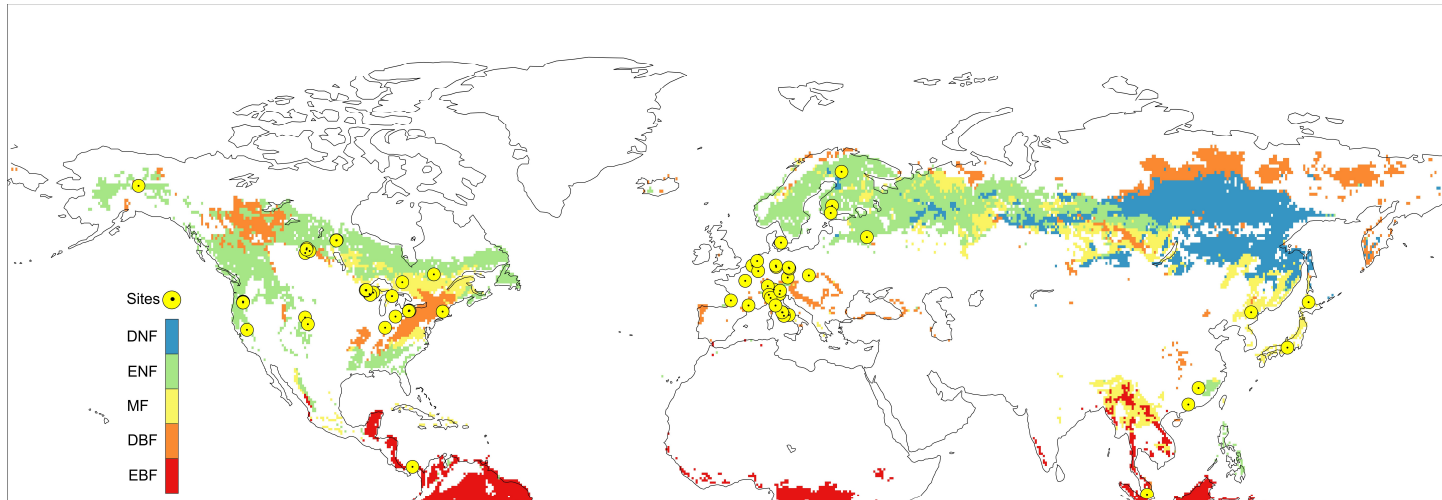

**Fig. S1.** Spatial distribution of studied EC sites and forest types based on Simple Biosphere (SiB) model of International Satellite Land Surface Climatology Project (ISLSCP II). EBF: the evergreen broadleaf forest; ENF: evergreen needleleaf forest; DBF: deciduous broadleaf forest; DNF: deciduous needleleaf forest; MF: mixed forest.

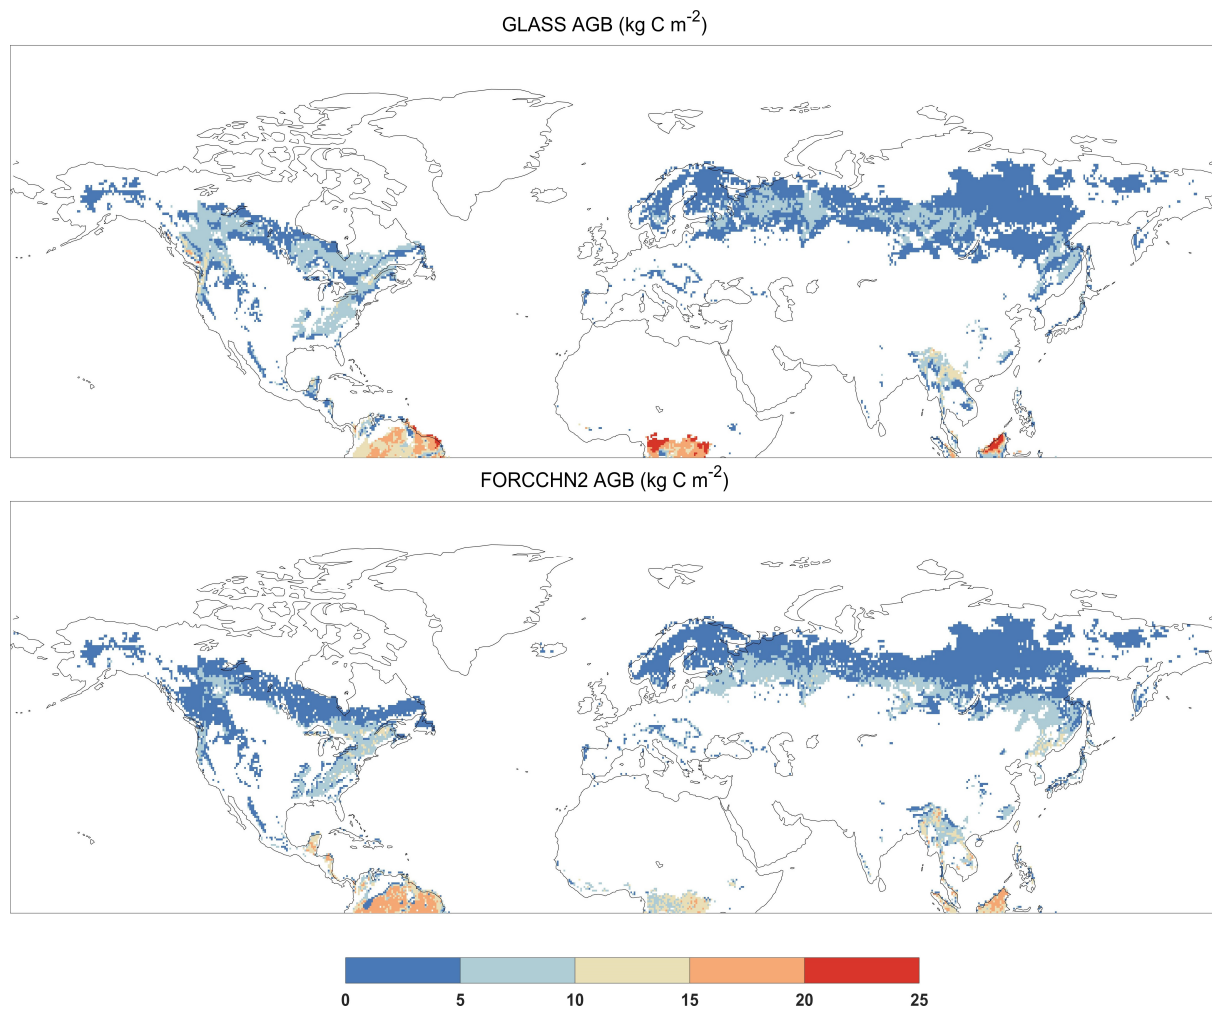

**Fig. S2.** The FORCCHN2-simulated and satellite-derived aboveground biomass (AGB) across the Northern Hemisphere. The satellite AGB are extracted from the GLASS product.

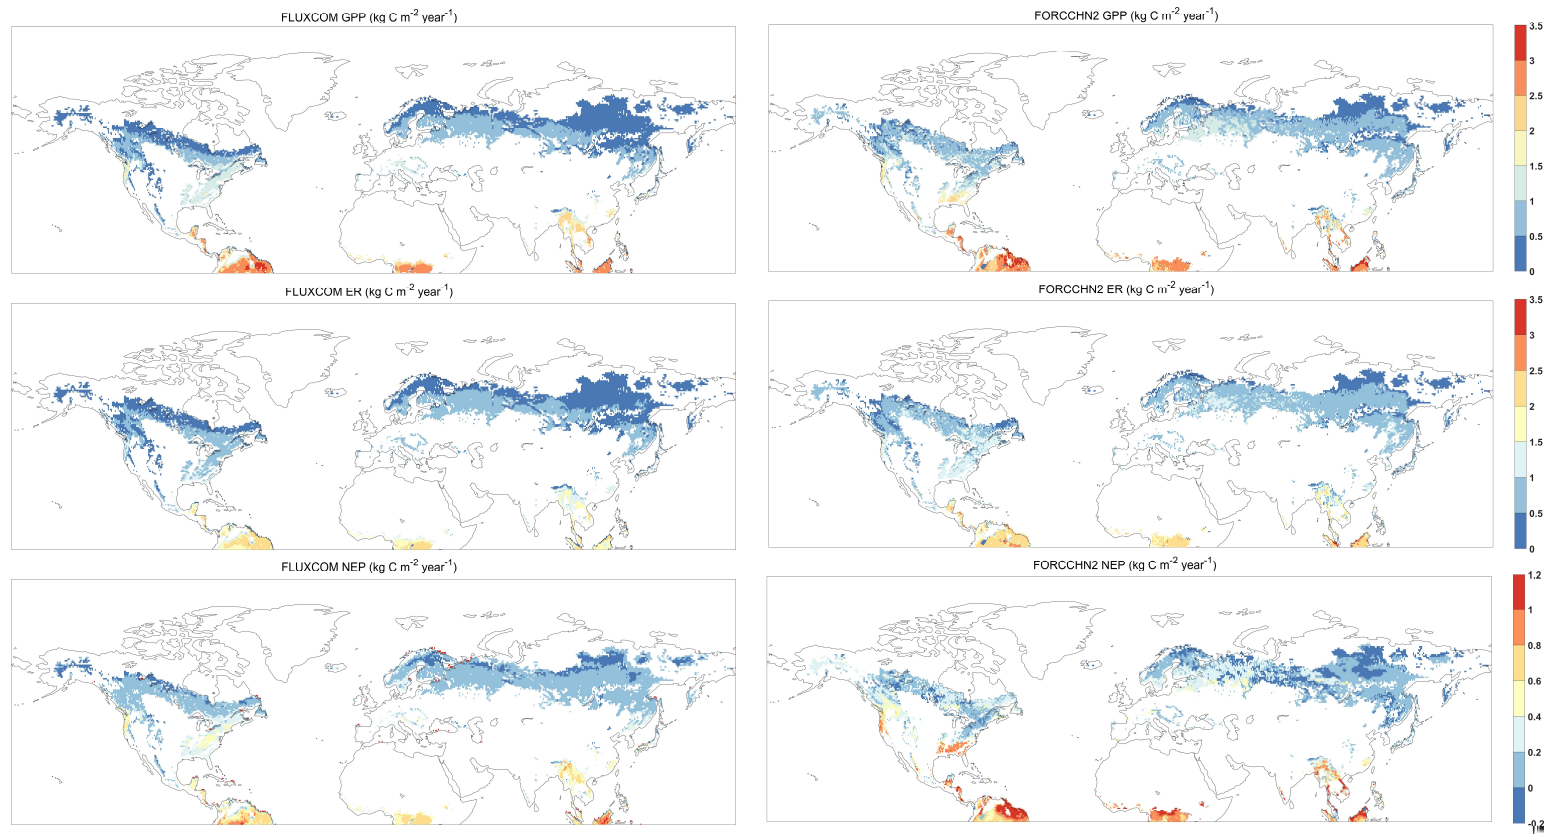

**Fig. S3.** The mean spatial distribution of FORCCHN2 and FLUXCOM gross primary productivity (GPP), ecosystem respiration (ER), and net ecosystem productivity (NEP) across the Northern Hemisphere during 1980–2013. The fluxes of FLUXCOM are extracted from the ‘RS+METEO’ dataset. The FLUXCOM NEP is equaled to the negative of net ecosystem CO<sub>2</sub> exchange (NEE). The spatial resolution is 0.5°×0.5°.

**Table S1.** The studied EC Site information of the observed flux. ENF: evergreen needleleaf forest;

EBF: evergreen broadleaf forest; DBF: deciduous broadleaf forest; MF: mixed forest.

| <b>Sites</b> | <b>Elevation (m)</b> | <b>Latitude (°)</b> | <b>Longitude (°)</b> | <b>Forest types</b> |
|--------------|----------------------|---------------------|----------------------|---------------------|
| BE-Bra       | 16                   | 51.3076             | 4.5198               | MF                  |
| BE-Vie       | 493                  | 50.3049             | 5.9981               | MF                  |
| CA-Gro       | 340                  | 48.2167             | -82.1556             | MF                  |
| CA-Man       | 259                  | 55.8796             | -98.4808             | ENF                 |
| CA-NS1       | 260                  | 55.8792             | -98.4839             | ENF                 |
| CA-NS2       | 260                  | 55.9058             | -98.5247             | ENF                 |
| CA-NS3       | 260                  | 55.9117             | -98.3822             | ENF                 |
| CA-NS4       | 260                  | 55.9144             | -98.3806             | ENF                 |
| CA-NS5       | 260                  | 55.8631             | -98.485              | ENF                 |
| CA-Oas       | 530                  | 53.6289             | -106.198             | DBF                 |
| CA-Obs       | 628.94               | 53.9872             | -105.118             | ENF                 |
| CA-Qfo       | 382                  | 49.6925             | -74.3421             | ENF                 |
| CA-SF1       | 536                  | 54.485              | -105.818             | ENF                 |
| CA-SF2       | 520                  | 54.2539             | -105.878             | ENF                 |
| CA-TP1       | 265                  | 42.6609             | -80.5595             | ENF                 |
| CA-TP2       | 212                  | 42.7744             | -80.4588             | ENF                 |
| CA-TP3       | 184                  | 42.7068             | -80.3483             | ENF                 |
| CA-TP4       | 184                  | 42.7102             | -80.3574             | ENF                 |
| CA-TPD       | 260                  | 42.6353             | -80.5577             | DBF                 |
| CH-Dav       | 1639                 | 46.8153             | 9.8559               | ENF                 |
| CH-Lae       | 689                  | 47.4783             | 8.3644               | MF                  |
| CN-Cha       | 1242                 | 42.4025             | 128.0958             | MF                  |
| CN-Din       | 240                  | 23.1733             | 112.5361             | EBF                 |
| CN-Qia       | 111                  | 26.7414             | 115.0581             | ENF                 |
| CZ-BK1       | 875                  | 49.5021             | 18.5369              | ENF                 |
| DE-Hai       | 430                  | 51.0792             | 10.4522              | DBF                 |
| DE-Lkb       | 1308                 | 49.0996             | 13.3047              | ENF                 |
| DE-Lnf       | 451                  | 51.3282             | 10.3678              | DBF                 |
| DE-Obe       | 734                  | 50.7867             | 13.7213              | ENF                 |
| DE-Tha       | 385                  | 50.9626             | 13.5651              | ENF                 |
| DK-Sor       | 40                   | 55.4859             | 11.6446              | DBF                 |
| FI-Hyy       | 181                  | 61.8474             | 24.2948              | ENF                 |
| FI-Let       | 111                  | 60.6418             | 23.9595              | ENF                 |
| FI-Sod       | 180                  | 67.3624             | 26.6386              | ENF                 |
| FR-Fon       | 103                  | 48.4764             | 2.7801               | DBF                 |
| FR-LBr       | 61                   | 44.7171             | -0.7693              | ENF                 |
| FR-Pue       | 270                  | 43.7413             | 3.5957               | EBF                 |
| IT-CA1       | 200                  | 42.3804             | 12.0266              | DBF                 |



|        |      |         |          |     |
|--------|------|---------|----------|-----|
| IT-Col | 1560 | 41.8494 | 13.5881  | DBF |
| IT-Cp2 | 19   | 41.7043 | 12.3573  | EBF |
| IT-Cpz | 68   | 41.7052 | 12.3761  | EBF |
| IT-Isp | 210  | 45.8126 | 8.6336   | DBF |
| IT-La2 | 1350 | 45.9542 | 11.2853  | ENF |
| IT-Lav | 1353 | 45.9562 | 11.2813  | ENF |
| IT-PT1 | 60   | 45.2009 | 9.061    | DBF |
| IT-Ren | 1730 | 46.5869 | 11.4337  | ENF |
| IT-Ro1 | 235  | 42.4081 | 11.93    | DBF |
| IT-Ro2 | 160  | 42.3903 | 11.9209  | DBF |
| IT-SR2 | 4    | 43.732  | 10.2909  | ENF |
| IT-SRo | 6    | 43.7279 | 10.2844  | ENF |
| JP-MBF | 676  | 44.3869 | 142.3186 | DBF |
| JP-SMF | 397  | 35.2617 | 137.0788 | MF  |
| MY-PSO | 102  | 2.973   | 102.3062 | EBF |
| NL-Loo | 25   | 52.1666 | 5.7436   | ENF |
| PA-SPn | 78   | 9.3181  | -79.6346 | DBF |
| RU-Fyo | 265  | 56.4615 | 32.9221  | ENF |
| US-Blo | 1315 | 38.8953 | -120.633 | ENF |
| US-GLE | 3197 | 41.3665 | -106.24  | ENF |
| US-Ha1 | 340  | 42.5378 | -72.1715 | DBF |
| US-MMS | 275  | 39.3232 | -86.4131 | DBF |
| US-Me2 | 1253 | 44.4523 | -121.557 | ENF |
| US-Me3 | 1005 | 44.3154 | -121.608 | ENF |
| US-Me4 | 922  | 44.4992 | -121.622 | ENF |
| US-Me5 | 1188 | 44.4372 | -121.567 | ENF |
| US-Me6 | 998  | 44.3233 | -121.608 | ENF |
| US-NR1 | 3050 | 40.0329 | -105.546 | ENF |
| US-Oho | 230  | 41.5545 | -83.8438 | DBF |
| US-PFa | 470  | 45.9459 | -90.2723 | MF  |
| US-Prr | 210  | 65.1237 | -147.488 | ENF |
| US-Syv | 540  | 46.242  | -89.3477 | MF  |
| US-UMB | 234  | 45.5598 | -84.7138 | DBF |
| US-UMd | 239  | 45.5625 | -84.6975 | DBF |
| US-WCr | 520  | 45.8059 | -90.0799 | DBF |
| US-Wi3 | 411  | 46.6347 | -91.0987 | DBF |
| US-Wi4 | 352  | 46.7393 | -91.1663 | ENF |
| US-Wi5 | 353  | 46.6531 | -91.0858 | ENF |
| US-Wi8 | 348  | 46.7223 | -91.2524 | DBF |
| US-Wi9 | 350  | 46.7385 | -91.0746 | ENF |

---

**Table S2.** Physiological and ecological parameters in the original FORCCHN2 model. ST: shade-tolerant; SIT: shade-intolerant

| Parameters        | Rain forest tree     |                      | Evergreen broadleaf tree |                      | Deciduous broadleaf tree |                      | Evergreen conifer tree |                      | Deciduous conifer tree |
|-------------------|----------------------|----------------------|--------------------------|----------------------|--------------------------|----------------------|------------------------|----------------------|------------------------|
|                   | ST                   | SIT                  | ST                       | SIT                  | ST                       | SIT                  | ST                     | SIT                  |                        |
| L <sub>o</sub>    | 5.5                  | 11.0                 | 5.5                      | 11.0                 | 5.5                      | 11.0                 | 5.5                    | 11.0                 | 11.0                   |
| Am                | 5.5×10 <sup>-4</sup> | 5.5×10 <sup>-4</sup> | 5.5×10 <sup>-4</sup>     | 5.5×10 <sup>-4</sup> | 5.0×10 <sup>-4</sup>     | 5.0×10 <sup>-4</sup> | 5.0×10 <sup>-4</sup>   | 5.0×10 <sup>-4</sup> | 5.0×10 <sup>-4</sup>   |
| Sl                | 1.3×10 <sup>-5</sup> | 1.3×10 <sup>-5</sup> | 1.3×10 <sup>-5</sup>     | 1.3×10 <sup>-5</sup> | 1.3×10 <sup>-5</sup>     | 1.3×10 <sup>-5</sup> | 1.3×10 <sup>-5</sup>   | 1.3×10 <sup>-5</sup> | 1.3×10 <sup>-5</sup>   |
| Kl                | 4.5×10 <sup>-1</sup> | 4.5×10 <sup>-1</sup> | 4.5×10 <sup>-1</sup>     | 4.5×10 <sup>-1</sup> | 4.0×10 <sup>-1</sup>     | 4.0×10 <sup>-1</sup> | 4.0×10 <sup>-1</sup>   | 4.0×10 <sup>-1</sup> | 3.5×10 <sup>-1</sup>   |
| r <sub>L</sub>    | 2.0×10 <sup>-3</sup> | 2.0×10 <sup>-3</sup> | 2.0×10 <sup>-3</sup>     | 2.0×10 <sup>-3</sup> | 6.0×10 <sup>-3</sup>     | 3.0×10 <sup>-3</sup> | 3.5×10 <sup>-3</sup>   | 3.5×10 <sup>-3</sup> | 1.2×10 <sup>-2</sup>   |
| r <sub>w</sub>    | 1.0×10 <sup>-3</sup> | 1.0×10 <sup>-3</sup> | 1.0×10 <sup>-3</sup>     | 1.0×10 <sup>-3</sup> | 2.0×10 <sup>-3</sup>     | 2.0×10 <sup>-3</sup> | 2.0×10 <sup>-3</sup>   | 2.0×10 <sup>-3</sup> | 2.0×10 <sup>-3</sup>   |
| r <sub>R</sub>    | 1.5×10 <sup>-3</sup> | 1.5×10 <sup>-3</sup> | 1.5×10 <sup>-3</sup>     | 1.5×10 <sup>-3</sup> | 2.5×10 <sup>-3</sup>     | 2.5×10 <sup>-3</sup> | 2.5×10 <sup>-3</sup>   | 2.5×10 <sup>-3</sup> | 2.5×10 <sup>-3</sup>   |
| lm <sub>2</sub>   | 0.50                 | 0.50                 | 0.40                     | 0.40                 | 0.40                     | 0.40                 | 0.50                   | 0.50                 | 0.50                   |
| CN <sub>L</sub>   | 40.0                 | 40.0                 | 45.0                     | 45.0                 | 40.0                     | 40.0                 | 60.0                   | 60.0                 | 50.0                   |
| CN <sub>w</sub>   | 200.0                | 200.0                | 200.0                    | 200.0                | 200.0                    | 200.0                | 200.0                  | 200.0                | 200.0                  |
| CN <sub>R</sub>   | 40.0                 | 40.0                 | 45.0                     | 45.0                 | 40.0                     | 40.0                 | 60.0                   | 60.0                 | 50.0                   |
| Hmax              | 40.0                 | 60.0                 | 50.0                     | 40.0                 | 40.0                     | 40.0                 | 60.0                   | 60.0                 | 50.0                   |
| Dmax              | 2.0                  | 3.0                  | 2.0                      | 1.5                  | 2.0                      | 1.5                  | 2.0                    | 2.0                  | 2.0                    |
| Amax              | 200.0                | 100.0                | 400.0                    | 200.0                | 400.0                    | 200.0                | 1000.0                 | 300.0                | 500.0                  |
| e <sub>L</sub>    | 600.0                | 600.0                | 600.0                    | 600.0                | 200.0                    | 700.0                | 700.0                  | 700.0                | 300.0                  |
| e <sub>R</sub>    | 20.0                 | 20.0                 | 20.0                     | 20.0                 | 30.0                     | 30.0                 | 15.0                   | 15.0                 | 28.0                   |
| cLAI <sub>L</sub> | 15.0                 | 15.0                 | 15.0                     | 15.0                 | 45.0                     | 20.0                 | 18.0                   | 18.0                 | 40.0                   |
| Astem             | 350.0                | 350.0                | 350.0                    | 350.0                | 350.0                    | 350.0                | 350.0                  | 350.0                | 350.0                  |
| Tmin              | 5.0                  | 5.0                  | 3.0                      | 1.0                  | -1.0                     | -5.5                 | -5.5                   | -2.5                 | -5.5                   |
| Topt              | 27.0                 | 29.0                 | 27.0                     | 25.0                 | 23.0                     | 20.0                 | 18.0                   | 23.0                 | 16.0                   |
| Tmax              | 50.0                 | 50.0                 | 50.0                     | 50.0                 | 45.0                     | 45.0                 | 40.0                   | 40.0                 | 35.0                   |
| DRY               | 1.0                  | 0.8                  | 0.9                      | 0.8                  | 0.8                      | 0.6                  | 0.9                    | 0.7                  | 0.5                    |
| l <sub>L</sub>    | 2.0×10 <sup>-3</sup> | 2.0×10 <sup>-3</sup> | 2.0×10 <sup>-3</sup>     | 2.0×10 <sup>-3</sup> | 1.1×10 <sup>-4</sup>     | 1.1×10 <sup>-4</sup> | 2.0×10 <sup>-3</sup>   | 2.0×10 <sup>-3</sup> | 1.1×10 <sup>-4</sup>   |
| Lr/Nr             | 40.0                 | 40.0                 | 40.0                     | 40.0                 | 30.0                     | 50.0                 | 80.0                   | 80.0                 | 50.0                   |

|       |                      |                      |                      |                      |                      |                      |                      |                      |                      |
|-------|----------------------|----------------------|----------------------|----------------------|----------------------|----------------------|----------------------|----------------------|----------------------|
| $l_R$ | $5.0 \times 10^{-5}$ | $5.0 \times 10^{-5}$ | $5.0 \times 10^{-5}$ | $5.0 \times 10^{-5}$ | $4.0 \times 10^{-5}$ | $4.0 \times 10^{-5}$ | $8.0 \times 10^{-5}$ | $8.0 \times 10^{-5}$ | $8.0 \times 10^{-5}$ |
| cp    | 10                   | 100                  | 10                   | 100                  | 10                   | 100                  | 10                   | 100                  | 100                  |

$L_o$ -the photosynthesis compensate point;  $A_m$ -the Maximal photosynthesis;  $SI$ -the initial slope of light intension and photosynthesis[ $\text{kg C}/(\text{m}^2 \cdot \text{h})/(\text{W}/\text{m}^2)$ ];  $Kl$ -the extinction coefficient;  $r_L$ -the relative breath rate of foliage (1/d);  $r_W$ -the relative breath rate of wood (1/d);  $r_R$ -the relative breath rate of root(1/d);  $lm_2$ - the threshold value of fruit;  $CN_L$ -the C:N ratio of foliage;  $CN_w$ -the C:N ratio of wood;  $CN_R$ -the C:N ratio of root;  $Hmax$ -the maximal tree height (m);  $Dmax$ -the maximal tree diameter (m);  $Amax$ -the maximal tree age (a);  $e_L$ -the coefficient of leaf content ( $\text{kgC}/\text{m}^2$ );  $e_R$ -the coefficient of root content ( $\text{kgC}/\text{m}^2$ );  $cLAI_L$ -the coefficient of leaf area ( $\text{m}^2/\text{kgC}$ );  $Astem$ -the bulk density of wood ( $\text{kgC}/\text{m}^3$ );  $Tmin$ -the lowest temperature of photosynthesis ( $^{\circ}\text{C}$ );  $Topt$ -the optimum temperature of photosynthesis ( $^{\circ}\text{C}$ );  $Tmax$ -the highest temperature of photosynthesis ( $^{\circ}\text{C}$ );  $DRY$ -the capability of enduring drought;  $l_L$ -the relative litter rate of leaves(1/d);  $Lr/Nr$ -the ration of lignin and nitrogen content;  $l_R$ -the relative litter rate of root(1/d);  $cp$ -the constant depends on the light gradient.

**Table S3.** Phenological parameters in the FORCCHN2 model

| Parameter | Meaning                                                                                   | Value     | Unit               |
|-----------|-------------------------------------------------------------------------------------------|-----------|--------------------|
| $S_{A0}$  | The initial heat parameter on the first day of the year (calculated by first year)        | (Eqn S43) | -                  |
| $S_B$     | a predetermined level to determine $Y_{cease}$ (calculated by first year)                 | (Eqn S45) | -                  |
| $c$       | A parameter of temperature response factor                                                | 0.185     | -                  |
| $d$       | A parameter of temperature response factor                                                | 18.4      | $^{\circ}\text{C}$ |
| $T_B$     | The threshold parameter to determine the effective temperature (calculated by first year) | (Eqn S44) | $^{\circ}\text{C}$ |

**Table S4.** Parameters of soil decomposition rate in the FORCCHN2 model.

| Symbol | Unit            | Litter and matter pool              | Value                |
|--------|-----------------|-------------------------------------|----------------------|
| S1     | d <sup>-1</sup> | Above-ground metabolic litter pool  | 0.08                 |
| S2     | d <sup>-1</sup> | Above-ground structural litter pool | 0.021                |
| S3     | d <sup>-1</sup> | Below-ground metabolic litter pool  | 0.1                  |
| S4     | d <sup>-1</sup> | Below-ground structural litter pool | 0.027                |
| S5     | d <sup>-1</sup> | Fine woody litter pool              | 0.01                 |
| S6     | d <sup>-1</sup> | Coarse woody litter pool            | 0.002                |
| S7     | d <sup>-1</sup> | Below-ground coarse litter pool     | 0.002                |
| S8     | d <sup>-1</sup> | Above-ground active pool            | 0.04                 |
| S9     | d <sup>-1</sup> | Active soil organic matter pool     | 0.04                 |
| S10    | d <sup>-1</sup> | Slow soil organic matter pool       | 0.001                |
| S11    | d <sup>-1</sup> | Resistant soil organic matter pool  | $3.5 \times 10^{-5}$ |

**Table S5.** Initialized allocation parameter of each soil pool in the FORCCHN2 model. These parameters are used as  $s_i$  in Eqn 16.

| Litter and matter pool              | Value (1/d) |
|-------------------------------------|-------------|
| Above-ground metabolic litter pool  | 0.01        |
| Above-ground structural litter pool | 0.01        |
| Below-ground metabolic litter pool  | 0.01        |
| Below-ground structural litter pool | 0.01        |
| Fine woody litter pool              | 0.01        |
| Coarse woody litter pool            | 0.01        |
| Below-ground coarse litter pool     | 0.01        |
| Above-ground active pool            | 0.01        |
| Active soil organic matter pool     | 0.02        |
| Slow soil organic matter pool       | 0.02        |
| Resistant soil organic matter pool  | 0.88        |
